# Supplementary material for: Simultaneous Detection of Ochratoxin A and Aflatoxins in Industrial and Traditional Red and isot Pepper Flakes along with Dietary Exposure Risk Assessment
Source: PubMed Central journal article supplement (PMC9476180; doi:10.1021/acsomega.2c02236), 2022-08-26
Supplement: ao2c02236_si_001.pdf [file ao2c02236_si_001.pdf]

## Supporting Information

### **Simultaneous detection of ochratoxin A and aflatoxins in industrial and traditional red and *isot* pepper flakes along with dietary exposure risk assessment**

Sebahat Oztekin<sup>1,2</sup>, and Funda Karbancioglu-Guler<sup>1\*</sup>

<sup>1</sup>Department of Food Engineering, Faculty of Chemical and Metallurgical Engineering, Istanbul Technical University, Maslak 34469, Istanbul, Turkey.

<sup>2</sup>Department of Food Engineering, Faculty of Engineering, Bayburt University, Bayburt 69000, Turkey.

#### **Corresponding author**

Funda Karbancioglu-Guler, [karbanci@itu.edu.tr](mailto:karbanci@itu.edu.tr)

Department of Food Engineering, Faculty of Chemical and Metallurgical Engineering, Istanbul Technical University, Maslak 34469, Istanbul, Turkey.

**a**

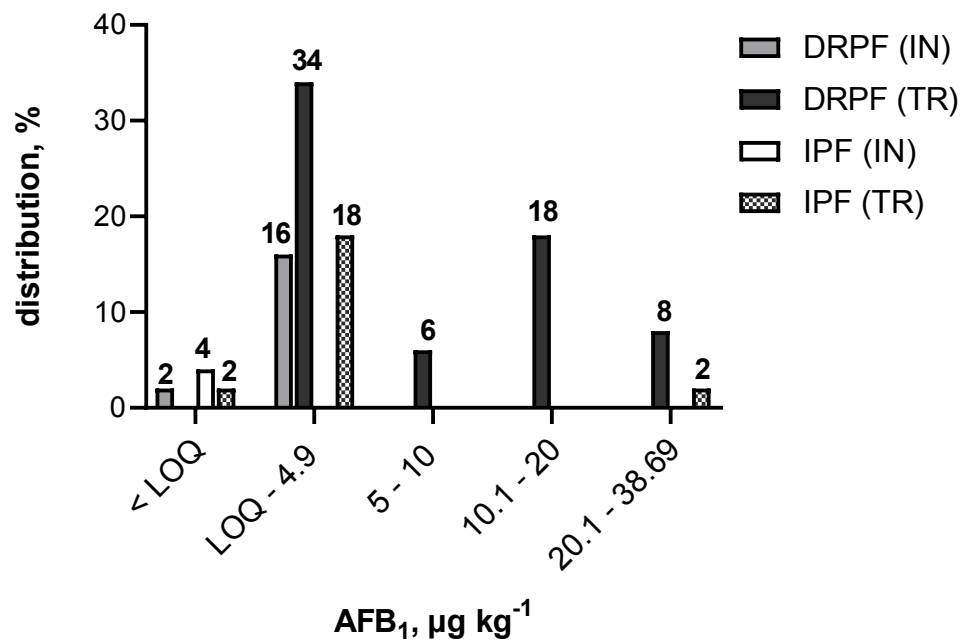

**b**

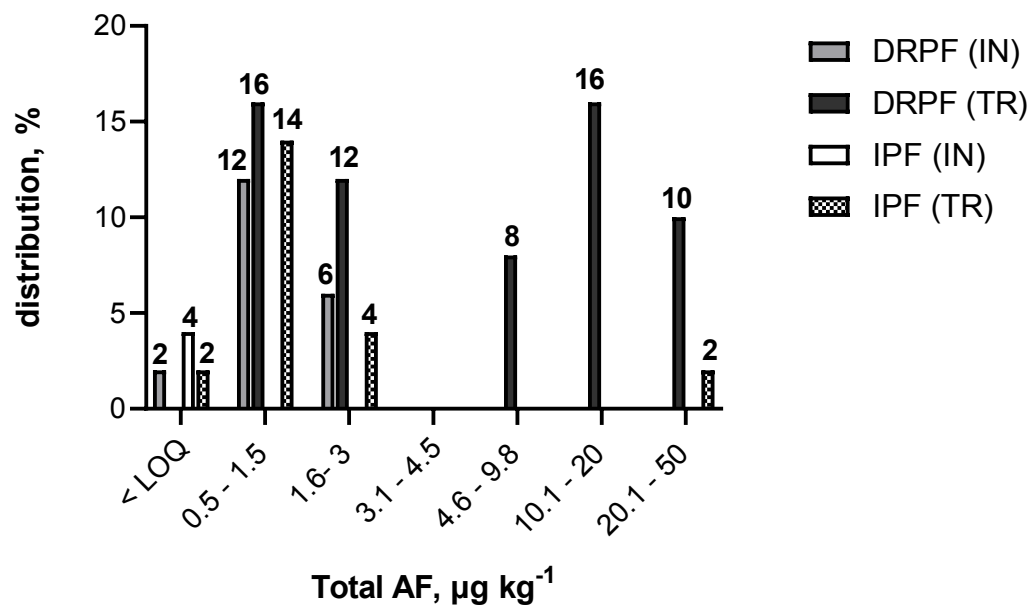

**c**

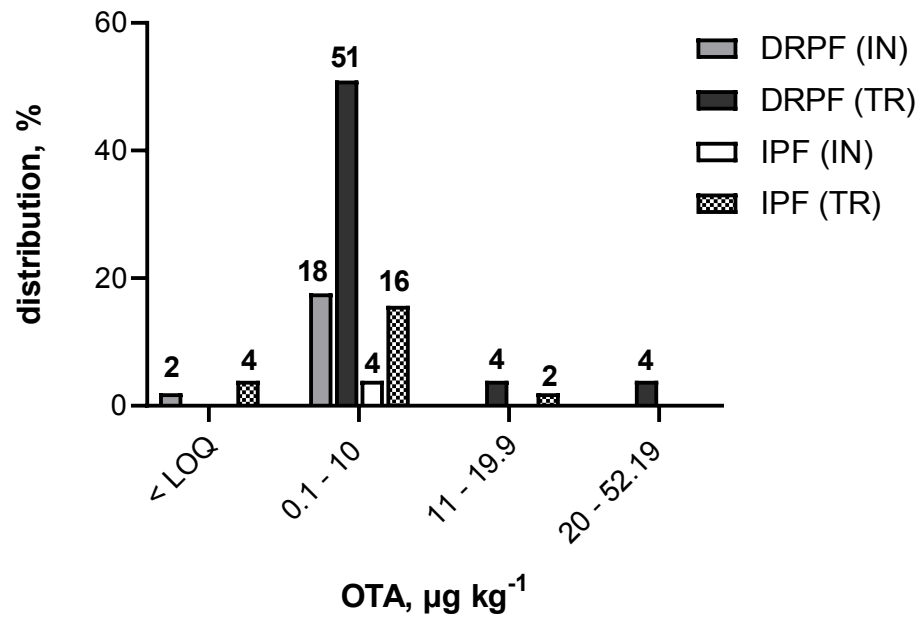

**Figure. S1.** AFB<sub>1</sub> (A), Total AF (B), and OTA (C) contamination ranges in red pepper samples

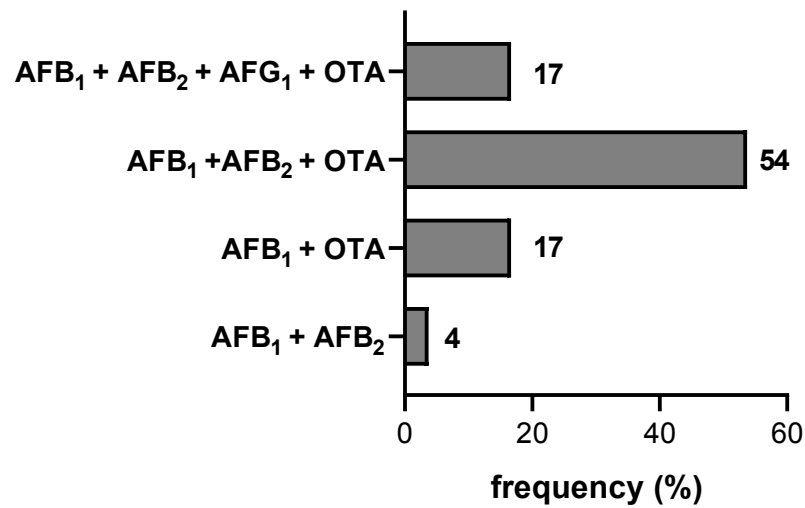

**Figure. S2.** Co-occurrence of AFs and OTA in samples
